# Supplementary material for: A circRNA signature predicts postoperative recurrence in stage II/III colon cancer
Source: PubMed Central journal article supplement (PMC6783650; doi:10.15252/emmm.201810168), 2019-09-02
Supplement: EMMM-11-e10168-s001.pdf [file EMMM-11-e10168-s001.pdf]

# Appendix

## **A circRNA signature predicts postoperative recurrence in stage II/III colon cancer**

Huai-Qiang Ju, Qi Zhao, Feng Wang, Ping Lan, Zixian Wang, Zhi-Xiang Zuo,  
Qi-Nian Wu, Xin-Juan Fan, Hai-Yu Mo, Li Chen, Ting Li, Chao Ren, Xiang-Bo  
Wan, Gong Chen, Yu-Hong Li, Wei-Hua Jia, Rui-Hua Xu

### **Appendix Table**

**Appendix Table S1. Characteristics of 4 circRNA markers and their coefficients in stage II/III colon cancer prognosis prediction of disease free survival.**

**Appendix Table S2. The final Cox regression model for prediction of disease-free survival.**

**Appendix Table S3. The final Cox regression model for prediction of overall survival.**

**Appendix Table S4. The circRNA ID, gene symbol, divergent primer and Back-splice junction (BSJ) coordinate for 22 circRNAs.**

**Appendix Table S5. *P* values for differences between experimental groups in figures.**

**Appendix Table S1:**

**Characteristics of 4 circRNA markers and their coefficients in stage II/III colon cancer prognosis prediction of disease free survival.**

| <b>CircRNA</b>          | <b>ID</b> | <b>Coefficient</b> | <b>HR (%CI)</b> | <b>P value</b> |
|-------------------------|-----------|--------------------|-----------------|----------------|
| <b>hsa_circ_0122319</b> | 0.4604    | 1.5847             | (1.1020-2.2789) | 0.013          |
| <b>hsa_circ_0008039</b> | -0.3862   | 0.6796             | (0.5602-0.8246) | <0.001         |
| <b>hsa_circ_0079480</b> | 0.2929    | 1.3402             | (1.0140-1.7714) | 0.04           |
| <b>hsa_circ_0087391</b> | 0.4386    | 1.5505             | (1.1516-2.0877) | 0.004          |

HR: hazard ratio. CI=confidence interval. CircRNA=Circular RNA

**Appendix Table S2:****The final Cox regression model for prediction of disease-free survival.**

|                         | <b>HR (95% CI)</b> | <b>P value</b> |
|-------------------------|--------------------|----------------|
| CirScore (high vs. low) | 4.67 (2.66–8.20)   | <0.0001        |
| Age (≥65 vs. <65)       | 1.49 (0.91–2.45)   | 0.1153         |
| N stage (N1 vs. N0)     | 1.51 (0.84–2.73)   | 0.1686         |
| N stage (N2 vs. N0)     | 2.79 (1.54–5.05)   | 0.0007         |
| NI (yes vs. no)         | 2.91 (1.78–4.76)   | <0.0001        |
| VI (yes vs. no)         | 3.28 (1.99–5.39)   | <0.0001        |

HR=hazard ratio. CI=confidence interval. NI=perineural invasion. VI=lymphatic or vascular invasion.

**Appendix Table S3:****The final Cox regression model for prediction of overall survival.**

|                         | <b>HR (95% CI)</b> | <b>P value</b> |
|-------------------------|--------------------|----------------|
| CirScore (high vs. low) | 5.45 (2.70–11.00)  | <0.0001        |
| Age (≥65 vs. <65)       | 1.61 (0.90–2.89)   | 0.1110         |
| N stage (N1 vs. N0)     | 2.64 (1.30–5.37)   | 0.0074         |
| N stage (N2 vs. N0)     | 3.68 (1.78–7.65)   | 0.0005         |
| NI (yes vs. no)         | 2.64 (1.49–4.66)   | 0.0008         |
| VI (yes vs. no)         | 2.30 (1.27–4.16)   | 0.0058         |

HR=hazard ratio. CI=confidence interval. NI=perineural invasion. VI=lymphatic or vascular invasion.

**Appendix Table S4:****The circRNA ID, gene symbol, divergent primer and Back-splice junction (BSJ) coordinate for 22 circRNAs.**

| <b>CircRNA ID*</b> | <b>Gene symbol</b>   | <b>Forward primer</b>  | <b>Reverse primer</b>  | <b>BSJ (hg19)</b>        | <b>Previous reports</b> |
|--------------------|----------------------|------------------------|------------------------|--------------------------|-------------------------|
| hsa_circ_0122319   | NM_182943;PLOD2      | tgaaagaagtcatggaacac   | aatcgatggaatccatcact   | chr3:145838898:145842016 | \                       |
| hsa_circ_0008039   | NM_001164761;PRKAR1B | acgccgtgtcctacgtcag    | tgctgtctcctcctcctc     | chr7:716866:751164       | (Liu et al,<br>2018)    |
| hsa_circ_0079480   | NM_001101426;ISPD    | gcaaatcatcttagatcaatgc | tctgggaaattctctgaaac   | chr7:16298015:16317851   | \                       |
| hsa_circ_0087391   | NM_001286715;AGTPBP1 | tccagtctataaaattatctgc | cattgatcttccagttga     | chr9:88284400:88327481   | \                       |
| hsa_circ_0016600   | NM_001373;DNAH14     | ctcatacctacttggaatggc  | ctataaaggaactggctgctc  | chr1:225140372:225161855 | \                       |
| hsa_circ_0016601   | NM_001373;DNAH14     | gtacttttctaaagccagttc  | tctctaattggttcacatcttc | chr1:225140372:225195246 | \                       |
| hsa_circ_0003500   | NM_001244898;PTBP3   | ctcctattactcctcacctcg  | tcatcagatccccgagcttg   | chr9:115030329:115060196 | \                       |

|                  |                    |                          |                        |                          |                     |
|------------------|--------------------|--------------------------|------------------------|--------------------------|---------------------|
| hsa_circ_0073762 | NR_046207;SLC12A2  | gaacaactccaggaggagc      | ccttaagcaactccaccacg   | chr5:127466759:127477673 | \                   |
| hsa_circ_0004887 | NM_198433;AURKA    | atgctaccagagtctacct      | ctcaggattatnttagtagcag | chr20:54956489:54959380  | \                   |
| hsa_circ_0005598 | NM_001009;RPS5     | agatcatacacctgctcaca     | ctgcaatgtaatcctggttc   | chr19:58904343:58904854  | \                   |
| hsa_circ_0001944 | NR_026975;FIRRE    | ggtctgttccaatacaagaag    | ctgacaccttagtctcctcata | chrX:130883334:130928494 | (Fu et al,<br>2018) |
| hsa_circ_0078607 | NM_021977;SLC22A3  | gctgattactcggaagaaag     | agacaaggtaaactctgag    | chr6:160819011:160831878 | \                   |
| hsa_circ_0000778 | NM_152347;EFCAB13  | tggtatacctgatttgagc      | tgtactttgtcaccttcttg   | chr17:45479498:45492285  | \                   |
| hsa_circ_0006618 | NM_014933;SEC31A   | gtgaacatttccagcaggatg    | catccaattgctgagcagatg  | chr4:83799883:83803093   | \                   |
| hsa_circ_0001064 | NM_020909;EPB41L5  | ggtgatatgcatgtgtcaag     | gatgctttgtaccatccaac   | chr2:120830754:120836157 | \                   |
| hsa_circ_0067582 | NM_001303246;RASA2 | agcttggtgtacagtgaagc     | ctggaaagttcttggatctc   | chr3:141231005:141259451 | \                   |
| hsa_circ_0004270 | NM_013386;SLC25A24 | ggcatatgaacagtacaagaag   | catcaacatcaatgctccattg | chr1:108690901:108703915 | \                   |
| hsa_circ_0008336 | NM_198428;BBS9     | gagctgtacaatttcgggccattc | aactcgcggaatgcctgcttg  | chr7:33397467:33427756   | \                   |
| hsa_circ_0004689 | NM_017673;SWT1     | gcagctgtgagggatattc      | gacctgtactgaaagcatg    | chr1:185183639:185200840 | \                   |

---

|                  |                    |                      |                           |                          |   |
|------------------|--------------------|----------------------|---------------------------|--------------------------|---|
| hsa_circ_0001824 | NM_001247996;ASAP1 | ttataggtccttggtcaag  | cagttatgactaataattatcattc | chr8:131164982:131181313 | \ |
| hsa_circ_0025967 | NM_004719;SCAF11   | cgtgagaaagactttgccag | cttgcaagaagtaccctgtc      | chr12:46319925:46322642  | \ |
| hsa_circ_0079534 | NM_182762;MACC1    | gatgttgctgttgaggtgga | gccaattgtgaagcaagtctg     | chr7:20193816:20201493   | \ |

---

## REFERENCES

Fu B, Zhang A, Li M, Pan L, Tang W, An M, Liu W, Zhang J (2018) Circular RNA profile of breast cancer brain metastasis: identification of potential biomarkers and therapeutic targets. *Epigenomics* **10**: 1619-1630

Liu Y, Lu C, Zhou Y, Zhang Z, Sun L (2018) Circular RNA hsa\_circ\_0008039 promotes breast cancer cell proliferation and migration by regulating miR-432-5p/E2F3 axis. *Biochem Biophys Res Commun* **502**: 358-363

**Appendix Table S5.*****P* values for differences between experimental groups in figures.**

---

| <b>Figure 2C</b> |                         |   |                     |                |                       |
|------------------|-------------------------|---|---------------------|----------------|-----------------------|
|                  | <b>Student's t-test</b> |   | <b>Significant?</b> | <b>Summary</b> | <b><i>P</i> value</b> |
| hsa_circ_0122319 | T                       | N | Yes                 | **             | <0.0001               |
| hsa_circ_0087391 | T                       | N | Yes                 | **             | <0.0001               |
| hsa_circ_0079480 | T                       | N | Yes                 | **             | <0.0001               |
| hsa_circ_0008039 | T                       | N | Yes                 | **             | <0.0001               |

---

---

| <b>Figure 4B</b> |                         |    |                     |                |                       |
|------------------|-------------------------|----|---------------------|----------------|-----------------------|
|                  | <b>Student's t-test</b> |    | <b>Significant?</b> | <b>Summary</b> | <b><i>P</i> value</b> |
| hsa_circ_0079480 | SW620-sc                | #1 | Yes                 | **             | 0.0051                |
| hsa_circ_0079480 | SW620-sc                | #2 | Yes                 | **             | 0.0035                |
| hsa_circ_0079480 | HCT116-sc               | #1 | Yes                 | **             | 0.0056                |
| hsa_circ_0079480 | HCT116-sc               | #2 | Yes                 | **             | 0.0078                |
| hsa_circ_0087391 | SW620-sc                | #1 | Yes                 | **             | 0.0048                |
| hsa_circ_0087391 | SW620-sc                | #2 | Yes                 | **             | 0.0052                |
| hsa_circ_0087391 | HCT116-sc               | #1 | Yes                 | **             | 0.0034                |
| hsa_circ_0087391 | HCT116-sc               | #2 | Yes                 | **             | 0.0047                |

---



**Figure 4D**

|                  | <b>Student's t-test</b> |    | <b>Significant?</b> | <b>Summary</b> | <b><i>P value</i></b> |
|------------------|-------------------------|----|---------------------|----------------|-----------------------|
| hsa_circ_0122319 | HCT116-sc               | #1 | Yes                 | **             | 0.0039                |
| hsa_circ_0122319 | HCT116-sc               | #2 | Yes                 | **             | 0.0081                |
| hsa_circ_0079480 | HCT116-sc               | #1 | Yes                 | **             | 0.0092                |
| hsa_circ_0079480 | HCT116-sc               | #2 | Yes                 | **             | 0.0021                |
| hsa_circ_0087391 | HCT116-sc               | #1 | Yes                 | **             | 0.0021                |
| hsa_circ_0087391 | HCT116-sc               | #2 | Yes                 | **             | 0.0002                |
| hsa_circ_0122319 | SW620-sc                | #1 | Yes                 | **             | 0.0057                |
| hsa_circ_0122319 | SW620-sc                | #2 | Yes                 | **             | <0.0001               |
| hsa_circ_0079480 | SW620-sc                | #1 | Yes                 | **             | 0.0056                |
| hsa_circ_0079480 | SW620-sc                | #2 | Yes                 | **             | 0.0002                |
| hsa_circ_0087391 | SW620-sc                | #1 | Yes                 | **             | 0.0009                |
| hsa_circ_0087391 | SW620-sc                | #2 | Yes                 | **             | 0.0002                |

**Figure 4F**

|                  | <b>Student's t-test</b> |    | <b>Significant?</b> | <b>Summary</b> | <b><i>P value</i></b> |
|------------------|-------------------------|----|---------------------|----------------|-----------------------|
| hsa_circ_0079480 | SW620-sc                | #1 | Yes                 | *              | 0.0114                |
| hsa_circ_0079480 | <i>SW620-sc</i>         | #2 | Yes                 | **             | 0.0097                |
| hsa_circ_0079480 | HCT116-sc               | #1 | Yes                 | **             | 0.0025                |
| hsa_circ_0079480 | HCT116-sc               | #2 | Yes                 | **             | 0.0039                |

**Figure 4H**

|                  | <b>Student's t-test</b> |    | <b>Significant?</b> | <b>Summary</b> | <b>P value</b> |
|------------------|-------------------------|----|---------------------|----------------|----------------|
| hsa_circ_0079480 | SW620-sc                | #1 | Yes                 | **             | <0.0001        |
| hsa_circ_0079480 | SW620-sc                | #2 | Yes                 | **             | <0.0001        |
| hsa_circ_0079480 | HCT116-sc               | #1 | Yes                 | **             | <0.0001        |
| hsa_circ_0079480 | HCT116-sc               | #2 | Yes                 | **             | <0.0001        |

**Figure EV1A**

|                  | <b>Student's t-test</b> |   | <b>Significant?</b> | <b>Summary</b> | <b>P value</b> |
|------------------|-------------------------|---|---------------------|----------------|----------------|
| hsa_circ_0016600 | N                       | T | Yes                 | **             | <0.0001        |
| hsa_circ_0016601 | N                       | T | Yes                 | **             | <0.0001        |
| hsa_circ_0003500 | N                       | T | Yes                 | **             | <0.0001        |
| hsa_circ_0001944 | N                       | T | Yes                 | **             | <0.0001        |
| hsa_circ_0078607 | N                       | T | Yes                 | **             | <0.0001        |
| hsa_circ_0004887 | N                       | T | Yes                 | *              | 0.0408         |
| hsa_circ_0079534 | N                       | T | Yes                 | **             | <0.0001        |
| hsa_circ_0005998 | N                       | T | Yes                 | **             | 0.0005         |
| hsa_circ_0073762 | N                       | T | Yes                 | **             | <0.0001        |

**Figure EV1B**

|                  | <b>Student's t-test</b> |   | <b>Significant?</b> | <b>Summary</b> | <b>P value</b> |
|------------------|-------------------------|---|---------------------|----------------|----------------|
| hsa_circ_0000778 | N                       | T | Yes                 | **             | <0.0001        |

|                  |   |   |     |    |         |
|------------------|---|---|-----|----|---------|
| hsa_circ_0006618 | N | T | Yes | ** | <0.0001 |
| hsa_circ_0008336 | N | T | Yes | ** | 0.0011  |
| hsa_circ_0004270 | N | T | Yes | ** | <0.0001 |
| hsa_circ_0001046 | N | T | Yes | ** | <0.0001 |
| hsa_circ_0004689 | N | T | Yes | *  | 0.0052  |
| hsa_circ_0067582 | N | T | Yes | ** | <0.0001 |
| hsa_circ_0001842 | N | T | Yes | ** | <0.0001 |
| hsa_circ_0025967 | N | T | Yes | ** | 0.0022  |

**Figure EV2B**

|                  | Student's t-test |      | Significant? | Summary | <i>P value</i> |
|------------------|------------------|------|--------------|---------|----------------|
| hsa_circ_0122319 | circRNA          | mRNA | Yes          | **      | <0.0001        |
| hsa_circ_0087391 | circRNA          | mRNA | Yes          | **      | <0.0001        |
| hsa_circ_0079480 | circRNA          | mRNA | Yes          | **      | <0.0001        |
| hsa_circ_0008039 | circRNA          | mRNA | Yes          | **      | <0.0001        |

**Figure EV3C**

|                  | Student's t-test |    | Significant? | Summary | <i>P value</i> |
|------------------|------------------|----|--------------|---------|----------------|
| hsa_circ_0122319 | SW620-sc         | #1 | Yes          | **      | 0.0039         |
| hsa_circ_0122319 | SW620-sc         | #2 | Yes          | **      | 0.0015         |
| hsa_circ_0122319 | HCT116-sc        | #1 | Yes          | **      | 0.0094         |
| hsa_circ_0122319 | HCT116-sc        | #2 | Yes          | **      | 0.0095         |
