# Supplementary material for: A circRNA signature predicts postoperative recurrence in stage II/III colon cancer
Source: PubMed Central journal article supplement (PMC6783650; doi:10.15252/emmm.201810168), 2019-09-02
Supplement: EMMM-11-e10168-s002.pdf [file EMMM-11-e10168-s002.pdf]

## Expanded View Figures

**Figure EV1. Expression status of candidate circRNAs as colon cancer recurrence-specific biomarkers.**

A qRT-PCR validation of the nine selected upregulated circRNAs in an independent validation cohort of 48 pairs of colon cancer tissues.

B qRT-PCR validation of nine selected upregulated circRNAs in an independent validation cohort of 48 colon cancer tissues with or without recurrence.

Data information: The horizontal bar represents mean expression levels; N = adjacent normal tissues; T = tumor tissues; R = tumor tissues from the recurrence group.

\*\* $P < 0.01$ , Student's  $t$ -test, mean  $\pm$  SD. Exact  $P$ -values are specified in Appendix Table S5.

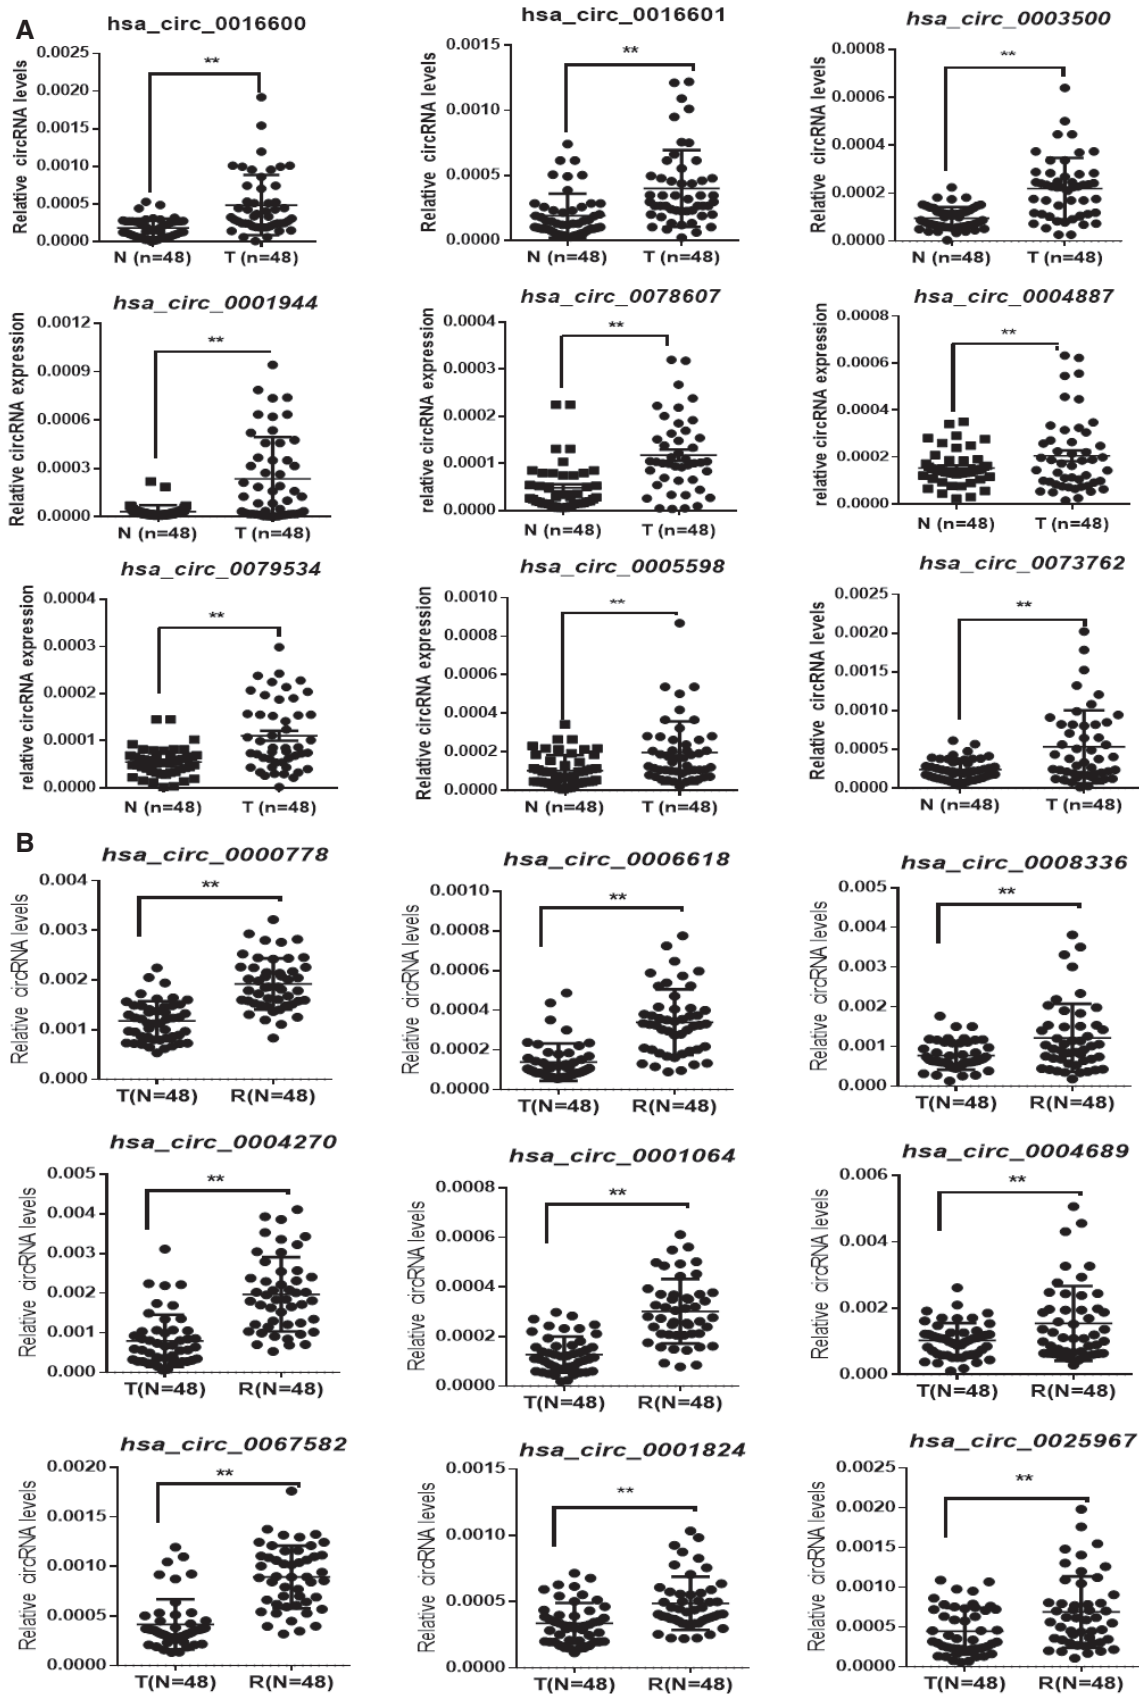

Figure EV1.

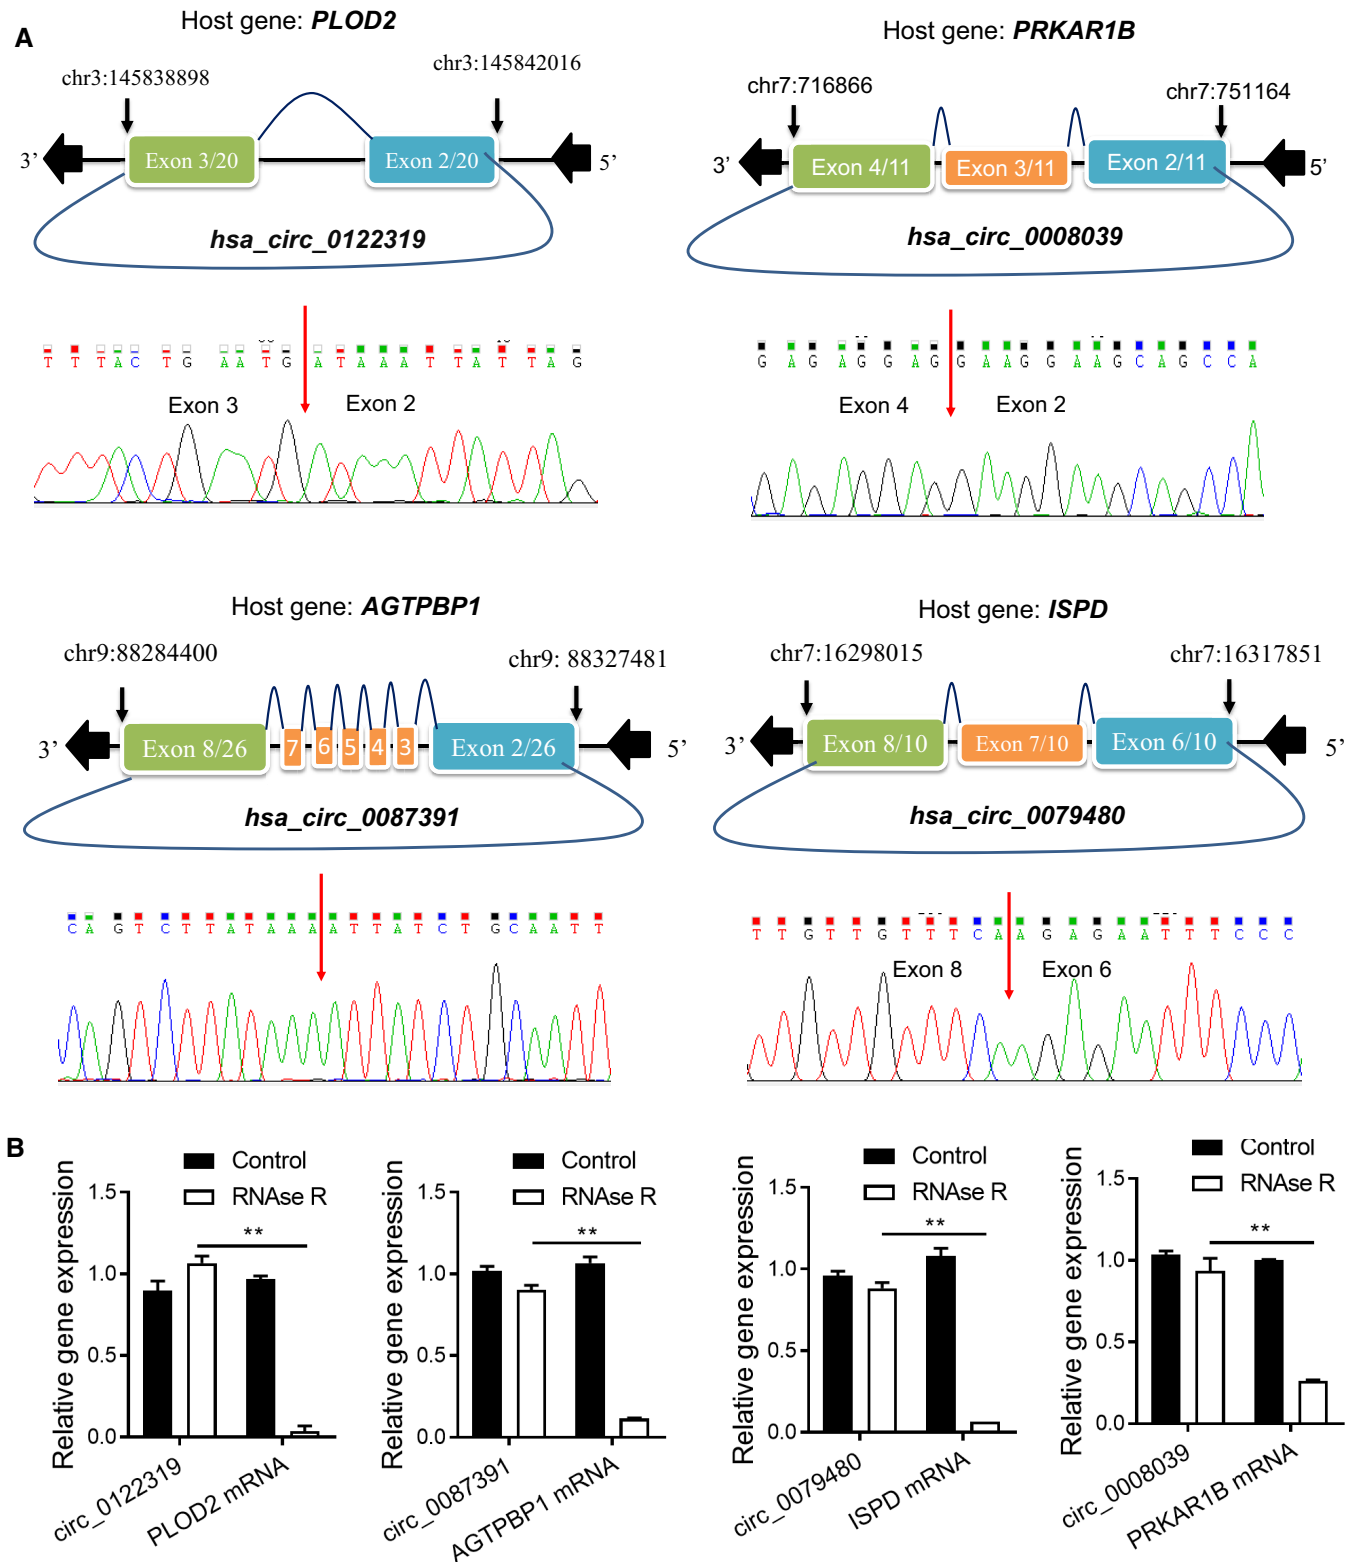

**Figure EV2. Characterization of selected circRNAs.**

A The genomic locus of the selected circRNAs, and the circRNA back-splice junction sites were detected by RT-PCR followed by Sanger sequencing.

B qRT-PCR analysis for the expression of four selected circRNAs and the corresponding host genes after treatment with RNase R in HCT116 cells. The data were normalized to mouse GAPDH mRNA by adding a mouse RNA spike to each fraction. \*\* $P < 0.01$ , Student's  $t$ -test, mean  $\pm$  SD ( $n = 3$ ). Exact  $P$ -values are specified in Appendix Table S5.

**Figure EV3. Characterization of selected circRNAs.**

- A qRT-PCR analysis of four circRNA expression in 11 colon cancer cell lines and 2 colon epithelial cells (CCD112 and CCD841). Data are presented as mean  $\pm$  SD ( $n = 3$ ).
- B RT-PCR products with divergent and convergent primers showing circularization of has\_circ\_0122319. cDNA, complementary DNA; gDNA, genomic DNA.
- C qRT-PCR evaluated the knockdown efficiency of has\_circ\_0122319 and has\_circ\_0097391 and the host gene (PLOD2 and AGTPBP1) expression in SW620 and HCT116 cells transfected with two unique shRNAs (#1, #2).  $**P < 0.01$ , Student's *t*-test, mean  $\pm$  SD ( $n = 3$ ). Exact *P*-values are specified in Appendix Table S5.
- D qRT-PCR evaluated the host gene (PLOD2, AGTPBP1, and ISPD) mRNA expression, and immunoblotting evaluated the PLOD2 protein expression in indicated cells.  $\beta$ -Actin antibody was used as a loading control. Data are presented as mean  $\pm$  SD ( $n = 3$ ).
- E Correlation analysis of transcriptome between two independent shRNA groups in SW620 and HCT116 cells. In each scatter plot, the log<sub>10</sub>-transformed Transcripts Per Million (TPM) of reads of each gene were utilized for calculating the spearman's coefficient. *R* represents Spearman's correlation coefficients, and *P*-values were calculated by Spearman's correlation test.

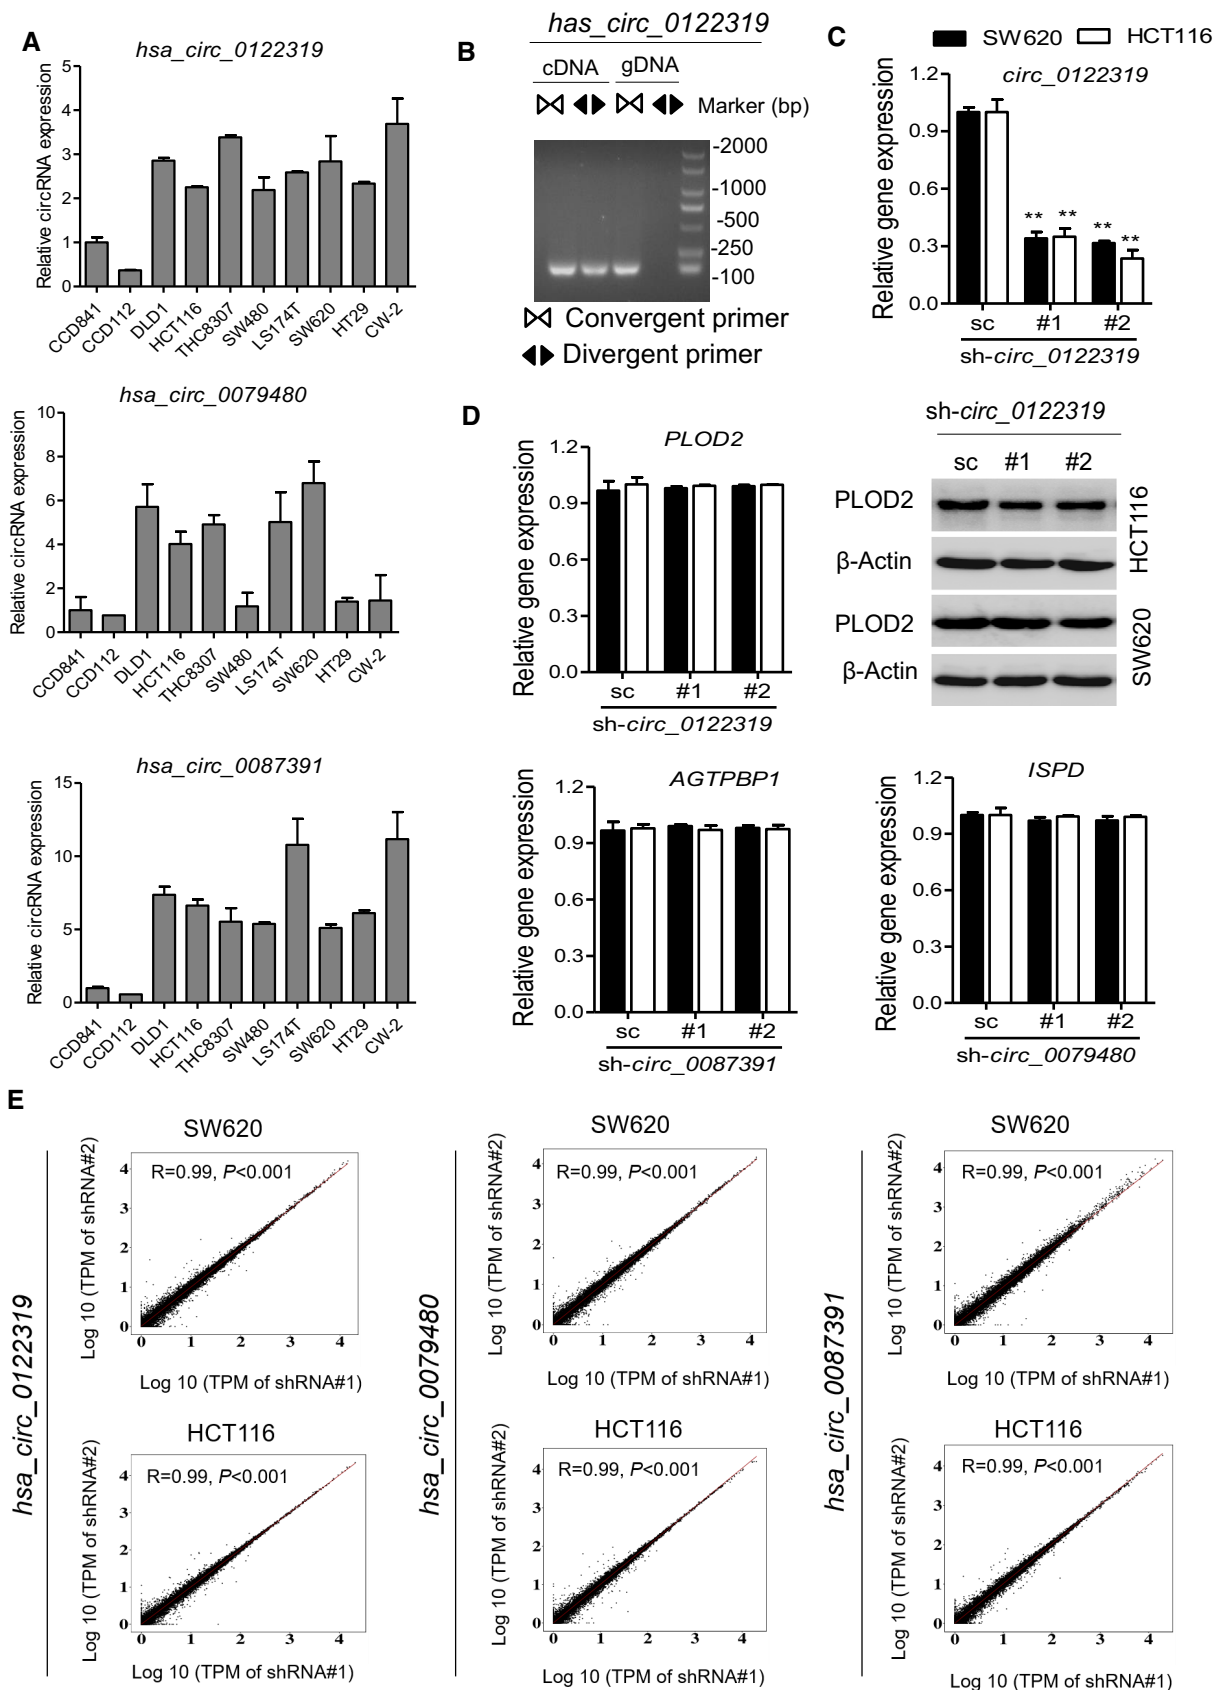

Figure EV3.

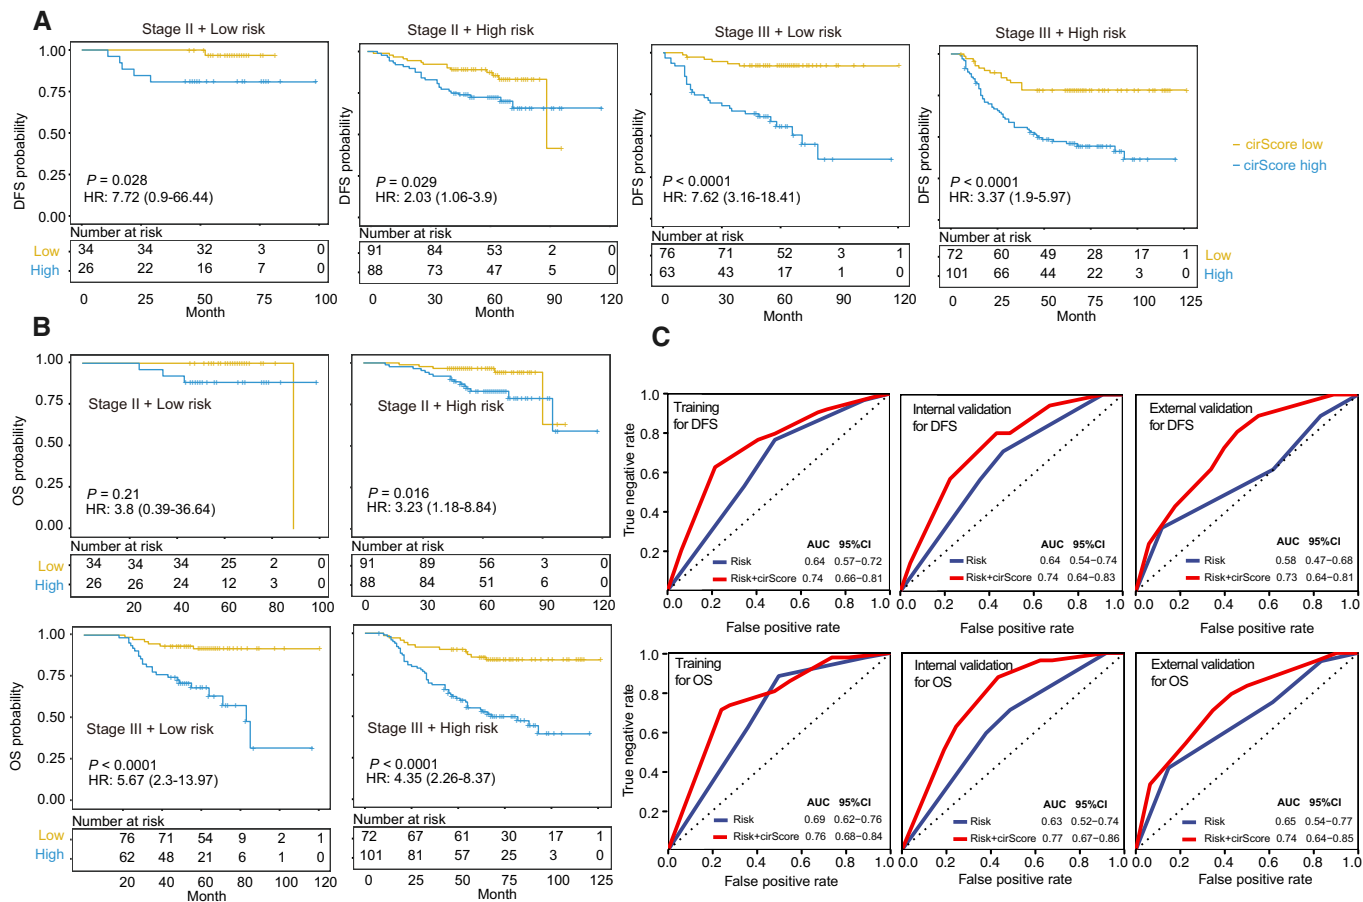

**Figure EV4. Stratified analysis with known risk factors.**

A The impact of the cirScore on DFS among the non-high-risk stage II ( $n = 60$ ) and stage III ( $n = 139$ ), and high-risk stage II ( $n = 179$ ) and stage III ( $n = 173$ ) subgroups.  
 B The impact of the cirScore on OS among the non-high-risk stage II ( $n = 60$ ) and stage III ( $n = 139$ ), and high-risk stage II ( $n = 179$ ) and stage III ( $n = 173$ ) subgroups.  
 C Time-dependent ROC analysis for predicting DFS and OS of stage II/III colon cancer patients in the three datasets using the clinical risk status + cirScore and clinical risk status only. AUC = area under the curve.

Data information: In (A, B), hazard ratios (HRs) were calculated with a univariate Cox regression analysis, and  $P$ -values were calculated with the log-rank test.

**Figure EV5. Building nomograms and time-dependent ROC analysis.**

A, B Calibration curve of 3-year DFS and 5-year DFS prediction in internal ( $n = 122$ ) and external validation ( $n = 180$ ) cohort. The 45-degree blue dotted line represents the reference line of an ideal nomogram. The error bars represent the 95% confidence intervals of the actual survival in the upper, middle, and lower tertiles.  
 C Nomogram to predict the OS of patients with stage II/III colon cancer.  
 D Calibration curves of the nomogram in prediction of the 3-year and 5-year OS in training ( $n = 249$ ), and internal ( $n = 122$ ) and external ( $n = 180$ ) validation cohort. The 45-degree blue dotted line represents the reference line of an ideal nomogram. The error bars represent the 95% confidence intervals of the actual survival in the upper, middle, and lower tertiles. NI, perineural invasion. VI, lymphatic or vascular invasion.

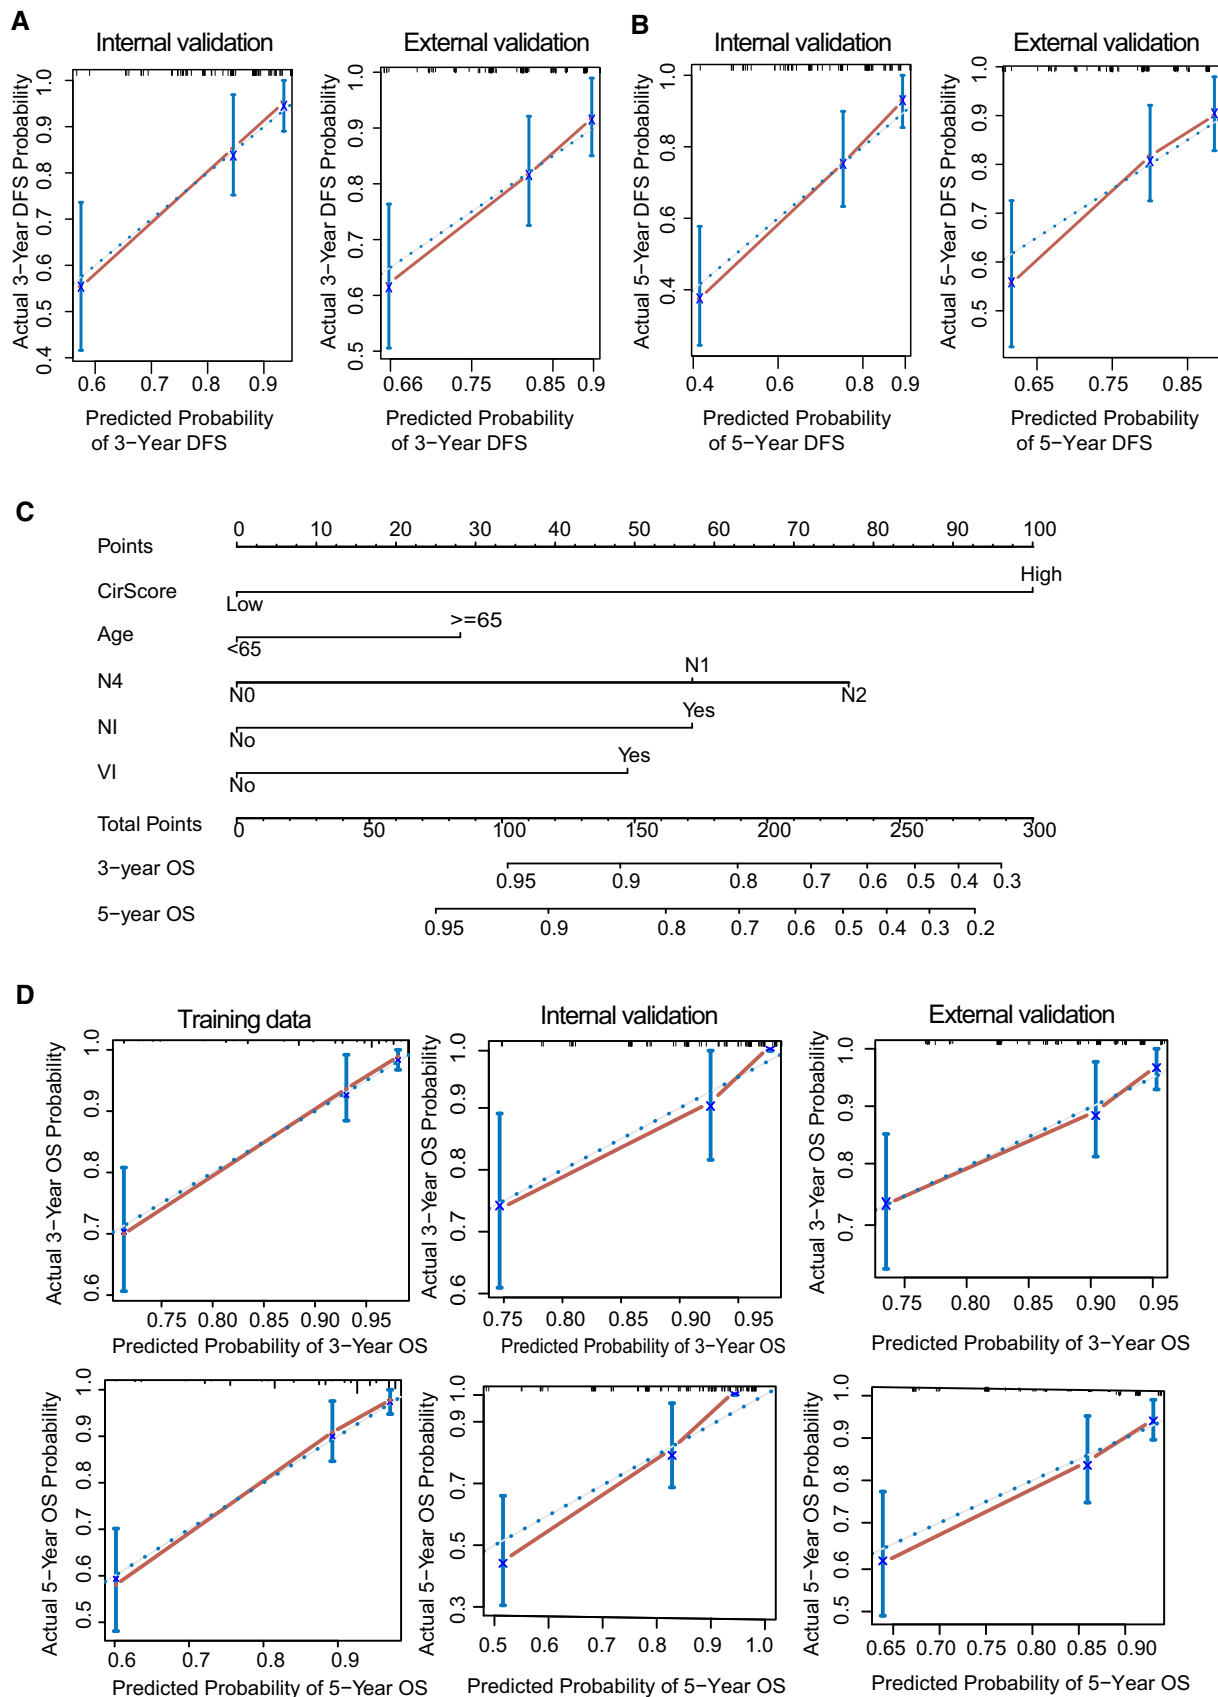

Figure EV5.
