# Supplementary material for: A circRNA signature predicts postoperative recurrence in stage II/III colon cancer
Source: PubMed Central journal article supplement (PMC6783650; doi:10.15252/emmm.201810168), 2019-09-02
Supplement: EMMM-11-e10168-s005.pdf [file EMMM-11-e10168-s005.pdf]

## A circRNA signature predicts postoperative recurrence in stage II/III colon cancer

Huai-Qiang Ju, Qi Zhao, Feng Wang, Ping Lan, Zixian Wang, Zhi-Xiang Zuo, Qi-Nian Wu, Xin-Juan Fan, Hai-Yu Mo, Li Chen, Ting Li, Chao Ren, Xiang-Bo Wan, Gong Chen, Yu-Hong Li, Wei-Hua Jia, Rui-Hua Xu

|                         |                     |                 |
|-------------------------|---------------------|-----------------|
| <b>Review timeline:</b> | Submission date:    | 5 December 2018 |
|                         | Editorial Decision: | 11 January 2019 |
|                         | Revision received:  | 20 March 2019   |
|                         | Editorial Decision: | 14 May 2019     |
|                         | Revision received:  | 28 June 2019    |
|                         | Editorial Decision: | 7 August 2019   |
|                         | Revision received:  | 15 August 2019  |
|                         | Accepted:           | 16 August 2019  |

Editor: Céline Carret

### Transaction Report:

(Note: With the exception of the correction of typographical or spelling errors that could be a source of ambiguity, letters and reports are not edited. The original formatting of letters and referee reports may not be reflected in this compilation.)

1st Editorial Decision

11 January 2019

Thank you for the submission of your manuscript to EMBO Molecular Medicine. We have now heard back from the two referees whom we asked to evaluate your manuscript.

As you will see from the comments below, while ref. 2 is supportive of publication and only requests to use more animals, move a SI figure as main and test the diagnosis signature using different circRNA combination, ref. 1 is more critical. This referee regrets the lack of conclusiveness and controls should be provided along with better description of techniques and programs used. The authors should deposit their data in public repositories (this is mandatory for publication in any EMBO Press journals), and reorganise the structure of the paper.

We would therefore welcome the submission of a revised version within three months for further consideration and would like to encourage you to address all the criticisms raised as suggested to improve conclusiveness and clarity. Please note that EMBO Molecular Medicine strongly supports a single round of revision and that, as acceptance or rejection of the manuscript will depend on another round of review, your responses should be as complete as possible.

EMBO Molecular Medicine has a "scooping protection" policy, whereby similar findings that are published by others during review or revision are not a criterion for rejection. Should you decide to submit a revised version, I do ask that you get in touch after three months if you have not completed it, to update us on the status.

I look forward to receiving your revised manuscript.

\*\*\*\*\* Reviewer's comments \*\*\*\*\*

### Referee #1 (Remarks for Author):

manuscript entitled: "A circRNA signature predicts postoperative recurrence in stage II/III colon

cancer" Xu et al., utilize circRNA expression to biomark colon cancer. Briefly the authors profile circRNAs from 667 patients with R0 resected stage II/III colon cancer. They then utilize a computational approach to identify a signature of circRNAs that could predict postoperative recurrence. They then validated the classifier in internal and external cohort. Last but not least, the performed loss of function assays that suggest a function of the selected circRNAs in colon cancer. This study addresses two very important and timely topics: putative roles of circRNAs in cancer and the possibility of using these molecules to biomark cancer. Unhappily the manuscript is below threshold for publication in EMBO Molecular Medicine and probably in most journals. However, if the authors can comprehensively modify the manuscript, in particular perform the required controls, it will be suitable for publication

#### Major issues:

1. None of the circRNAs under study have been verified for circularity. This should be done by RNaseR pretreatment followed by northern blot or qPCR with internal spike in. Moreover, the authors must state which circRNA annotation are they using. As I could check in circBase for the 4 circRNAs that form the cirScore, hsa\_circ\_0079480; hsa\_circ\_0008039; hsa\_circ\_0087391 were previously studied and annotated. However, circRNA13452 was impossible to find. The authors must use circBase annotation and provide all the information regarding this circRNAs, and the validated 22, (gene symbol, back-splice junction coordinates and previous reports on them) in a supplementary table.
2. The shRNA experiments are not quality for publication. No verification of the knockdown or the specificity was performed (not even against the host mRNA). The authors should indeed use more shRNAs (at least 3), show that all give the phenotype, show that all downregulate the targeted shRNA, show no effect on the linear mRNA (even better if possible at the protein level, by western blot) and perform a computational analysis to rule out off targets.
3. There are no GEO accession numbers or other public repository accession to the RNA sequencing data. In addition, the differential expression results must be complete in a supplementary table.
4. The authors do not state which circRNA search tool they use (find\_circ1 or 2, circ\_finder, CIRI, etc) or even which genome annotation they used.
5. The authors must state from which publication they are taking the least absolute shrinkage and selection operator (LASSO), LASSO-bagging algorithm, and how are they implementing it. They refer in Page 5: "model-based LASSO-bagging screen strategy" with no citation. They refer in Page 12: "This method has been successfully applied to establish prognostic prediction models using other biomarkers, such as mRNA (Yamanaka et al, 2016), miRNA (Zhang et al, 2013) and circulating tumor DNA methylation (Xu et al, 2017)". However, in Yamanaka et al no LASSO was explicitly used. On the contrary, in Zhang et al they explicitly state "We used the R software version 3.0.1 and the "glmnet" package (R Foundation for Statistical Computing, Vienna, Austria) to do the LASSO Cox regression model analysis.". What is more, in supplementary methods they give detail explanation on the LASSO. Huai-Qiang Ju et al, should do something similar.
6. The authors must discuss in detail the results of figure 5. They only mention "ROC analyses also indicated the superior prognostic accuracy of the nomograms for prediction of DFS and OS compared to the existing risk factors in all three datasets (Figure 5A-5F)". Also they should consider combine them with figure 4 or create a whole new results section talking about figure 5.
7. The authors should consider reorganizing the text and putting "Loss-of-function assay of selected circRNAs regulating cell metastasis" section before "Stratified analysis with known risk scheme" section.

#### Minor issues:

In the abstract:

"Using RNA-seq analysis, we profiled differential circRNA expression between patients with and without recurrence" They should say which tissue they sequenced and when.

"The four-circRNA-based cirScore was generated ". The phrase is not comprehensible by its own. The authors should say here something like: "With this information we generated a four-circ RNA..."

"shorter DFS and OS" the authors should define the acronyms they use before using them for the first time.

Page 3:

"and stage III colon cancer ." They have to define what are the marks for stage III as they did for stage II.

Page 4:

"The corresponding 5-year DFS (...) and 5-year OS rates" The authors have to define the terms they use (DFS and OS in this case).

Page 6:

"Risk score = (0.46expression level of circRNA13452)+(-0.386expression level of hsa\_circ\_0087391)+(0.293expression level of hsa\_circ\_0079480)+(0.439expression level of hsa\_circ\_0008039)" should be written as formula, not text.

Page 9:

The "RNAi assay" expression is misleading because the authors then talk about shRNA and this is a slightly different approach.

Page 24:

"Representative H&E staining and statistical results of metastatic lung nodules from mice injected with the indicated cells via the tail vein for 60 days" The authors must state what is H&E.

Figure 6:

The titles in the left are not centered.

Figure 1:

The authors should consider a different approach to explain the experimental procedure. Different colors and more space between the text are needed.

## Referee #2 (Remarks for Author):

In this manuscript, authors characterized a circRNA-based signature in prognostic evaluation of colon cancer. They found that cirScore of four circRNAs could be used to define colon cancer patients as high- and low-risk groups. Patients in high-risk group (with high cirScore) had a poorer DFS and OS than patients in low-risk group. This is a very interesting study.

Comments and suggestions:

- 1) In Figure 2D, 4 circRNAs are strongly predictive of DFS. Have authors tried to use a single circRNA (e.g. circRNA13452) or combination of two or three circRNAs to predict the prognosis of patients with colon cancer (e.g. circRNA13452 and hsa\_circ\_0087391)? What are the results?
- 2) In page 9 and page 10, the number of tested nude mice should be 8 per group.
- 3) As the result of knockdown of circRNAs (Figure S6B) is important, I suggest authors to move this data to Figure 6.

1st Revision - authors' response

20 March 2019

## Point-by-point replies to the reviewers' comments

### Referee #1 (Remarks for Author):

Manuscript entitled: "A circRNA signature predicts postoperative recurrence in stage II/III colon cancer" Xu et al., utilize circRNA expression to biomark colon cancer. Briefly the authors profile circRNAs from 667 patients with R0 resected stage II/III colon cancer. They then utilize a computational approach to identify a signature of circRNAs that could predict postoperative recurrence. They then validated the classifier in internal and external cohort. Last but not least, the performed loss of function assays that suggest a function of the selected circRNAs in colon cancer.

This study addresses two very important and timely topics: putative roles of circRNAs in cancer and the possibility of using these molecules to biomark cancer. Unhappily the manuscript is below threshold for publication in EMBO Molecular Medicine and probably in most journals. However, if

the authors can comprehensively modify the manuscript, in particular perform the required controls, it will be suitable for publication

**Response:** Thank you very much for your review of our manuscript. We also thank the reviewer for the positive comments regarding the scientific contribution of our manuscript and the following constructive suggestions.

Major issues: 1. None of the circRNAs under study have been verified for circularity. This should be done by RNaseR pretreatment followed by northern blot or qPCR with internal spike in. Moreover, the authors must state which circRNA annotation are they using. As I could check in circBase for the 4 circRNAs that form the cirScore, hsa\_circ\_0079480; hsa\_circ\_0008039; hsa\_circ\_0087391 were previously studied and annotated. However, circRNA13452 was impossible to find. The authors must use circBase annotation and provide all the information regarding this circRNAs, and the validated 22, (gene symbol, back-splice junction coordinates and previous reports on them) in a supplementary table.

**Response:** Thanks for pointing out this issue! As suggested, the circularity and stability of the four selected circRNAs have been verified by Sanger sequencing and RNase R treatment. After examined by RT-PCR with divergent primers, the sequenced PCR product was corresponding from the bioinformatics analysis with the exact back-splice junction (Fig EV2A). Compared with linear host genes, more resistance to digestion with RNase R exonuclease confirmed that these circRNAs harbors a circular RNA structure (Fig EV2B). These result has been added in the Fig EV2 and described in the revised manuscript (Page 8, Paragraph 1).

For the circRNA annotation, we firstly used the circBase for the known circRNAs, the novel identified and unannotated circRNAs in “circBase” are defined by rank number. The related information for these known and unannotated circRNAs has been provided in SourceDataForFig2 attached with Fig 2. For the circBase updates the gene list constantly, we just checked those previously unannotated circRNAs against the recent updated circBase. Surprisingly, we found that circRNA13452 (chr3:145838898-145842016), located on the chromosome chr3q24, has been included in the circBase annotated as hsa\_circ\_0122319. To maintain consistency, we have updated and modified circRNA13452 as hsa\_circ\_0122319 in our revised manuscript.

Besides, we also provided the more detailed information for validated 22 circRNAs, including gene symbol, divergent primer, back-splice junction coordinates and previous reports in Appendix Table S4.

2. The shRNA experiments are not quality for publication. No verification of the knockdown or the specificity was performed (not even against the host mRNA). The authors should indeed use more shRNAs (at least 3), show that all give the phenotype, show that all downregulate the targeted shRNA, show no effect on the linear mRNA (even better if possible at the protein level, by western blot) and perform a computational analysis to rule out off targets.

**Response:** We apologize for not providing convincing data. For these four circRNAs are generated by pre-mRNA 'back-splicing' of exons, we can only design two 21nt shRNAs targeting junctional sequences spanning 10–15 nt on either side. We also performed a computational analysis to rule out off targets. Take hsa\_circ\_0079480 for example as following:

(hsa\_circ\_0079480: The highlight letters “**TTTC**” are the circRNA back-splice junction site; Underlined letter are the sequences of shRNA#1, and the blue letters are the sequences of shRNA#2)

```
TTCAGCAAATCATCTTAGATCAATGCTACAATTTTGTGTTGTGAATGTTACAACCTCTG
ATTTTCAAGAAACCCAGAAGTTACTGAGCATGCTTGAAGAGAGTAGTCTTTGCATTTTA
TATCCTGTTGTTGTTTTTCGAGAATTTCCCAAGAGATTTGTGTAGTTATGGATACA
GAAGAAGATAACAAACATGTAGGTCATCTTCTTGAAGAAGTGCTGAAAAGTGAATTA
ATCATGTA  
AAAAGTCACATCTGAGGCTCTGGGTCATGCTGGCAGACATC
```

Both the knockdown efficiency and specificity were verified by qRT-PCR for the expression of circRNA and host mRNA (Figs 4B and EV3C). We also detected the protein expression encoded by three host genes (PLOD2, AGTPBP1, ISPD) in colon cancer cells with circRNA knockdown via immunoblotting analysis, however only PLOD2 protein be detected in colon cancer cells (Fig EV3D). The results demonstrated that knockdown of these circRNAs had no effects on the mRNA or protein expression of the host genes, suggesting that the regulatory effects directly results from targeting the circRNAs. These result has been described in the revised manuscript (Page 10, Paragraph 1). Hopefully, our above response gives you satisfaction!

3. There are no GEO accession numbers or other public repository accession to the RNA sequencing data. In addition, the differential expression results must be complete in a supplementary table.

**Response:** We thank the reviewer for the suggestion. We have submitted the RNA sequencing data to The Genome Sequence Archive for Human (GSA-Human) (HRA000037, Transcriptome profiles of patient with middle stage colon cancer). Also, the differential expression results have been provided in in SourceDataForFig2 attached with Fig 2.

4. The authors do not state which circRNA search tool they use (find\_circ1 or 2, circ\_finder, CIRI, etc) or even which genome annotation they used.

**Response:** We apologize for not providing a clear description. Actually, we applied three circRNA identification tools to search circRNAs, including circRNA\_finder, CIRI and UROBORUS. In addition, the hg38 genome reference we employed in alignment step. Coordinates of circRNAs were converted into hg19 position with liftover program from UCSC, and sequentially used for circRNA annotation with circBase. We have added these detailed descriptions in Appendix Supplementary Methods.

5. The authors must state from which publication they are taking the least absolute shrinkage and selection operator (LASSO), LASSO-bagging algorithm, and how are they implementing it. They refer in Page 5: "model-based LASSO-bagging screen strategy" with no citation. They refer in Page 12: "This method has been successfully applied to establish prognostic prediction models using other biomarkers, such as mRNA (Yamanaka et al, 2016), miRNA (Zhang et al, 2013) and circulating tumor DNA methylation (Xu et al, 2017)". However, in Yamanaka et al no LASSO was explicitly used. On the contrary, in Zhang et al they explicitly state "We used the R software version 3.0.1 and the "glmnet" package (R Foundation for Statistical Computing, Vienna, Austria) to do the LASSO Cox regression model analysis". What is more, in supplementary methods they give detail explanation on the LASSO. Huai-Qiang Ju et al, should do something similar.

**Response:** We apologize for not providing a clear description. We have remove the wrong cited literature (Yamanaka et al, 2016), and added more detailed description and correct literatures in the "LASSO-bagging procedure" and "Statistical analysis" sections in revised manuscript (Methods, Page 18& Page 21).

6. The authors must discuss in detail the results of figure 5. They only mention "ROC analyses also indicated the superior prognostic accuracy of the nomograms for prediction of DFS and OS compared to the existing risk factors in all three datasets (Figure 5A-5F)". Also they should consider combine them with figure 4 or create a whole new results section talking about figure 5.

**Response:** We thank the reviewer for the suggestion. We have combined the ROC analyses results (previous Figure 5A-5F) with Figure 4 as revised Fig 5, and discuss this point more detailed in the revised manuscript (Page 13, Paragraph 1).

7. The authors should consider reorganizing the text and putting "Loss-of-function assay of selected circRNAs regulating cell metastasis" section before "Stratified analysis with known risk scheme" section.

**Response:** We thank the reviewer for the suggestion. We have reorganized the texts and the Figures as suggested in our revised manuscript, which read more smoothly.

#### Minor issues:

1) In the abstract: "Using RNA-seq analysis, we profiled differential circRNA expression between patients with and without recurrence" They should say which tissue they sequenced and when.

2) "The four-circRNA-based cirScore was generated". The phrase is not comprehensible by its own. The authors should say here something like: "With this information we generated a four-circ RNA..."

**Response:** Thanks for suggestions! We have modified these description in our revised Abstract as following, "Using RNA-seq analysis of 20 paired frozen tissues collected post-operation, we profiled differential circRNA expression between patients with and without recurrence, followed by quantitative validation. With clinical information, we generated a four-circRNA-based cirScore to classify patients into high-risk and low-risk groups in the training cohort."

3) "shorter DFS and OS" the authors should define the acronyms they use before using them for the first time.

**Response:** Thanks for pointing out this issue! We have defined the acronyms of “DFS and OS” as “disease-free survival (DFS) and overall survival (OS)” in our revised Abstract.

4) Page 4: "The corresponding 5-year DFS (...) and 5-year OS rates" The authors have to define the terms they use (DFS and OS in this case).

5) Page 3: "and stage III colon cancer." They have to define what are the marks for stage III as they did for stage II.

**Response:** Thanks for pointing out this issue! The acronyms and the terms of “DFS and OS” have been defined the first time they are used in the revised manuscript (Page 6, Paragraph 3). The term of “stage III colon cancer” has also been defined as N1/N2M0 disease irrespective of T stage in the revised manuscript (Page 5, Paragraph 1).

6) Page 6: "Risk score = (0.46expression level of circRNA13452)+(-0.386expression level of hsa\_circ\_0087391)+(0.293expression level of hsa\_circ\_0079480)+(0.439expression level of hsa\_circ\_0008039)" should be written as formula, not text.

7) Page 9: The "RNAi assay" expression is misleading because the authors then talk about shRNA and this is a slightly different approach.

**Response:** Thanks for pointing out this issue! The description “Risk score =...” has been changed as formula:

$$cirScore = 0.46 \times \text{Exp}_{hsa\_circ\_0122319} + 0.386 \times \text{Exp}_{hsa\_circ\_0083791} + 0.293 \times \text{Exp}_{hsa\_circ\_0079480} + 0.439 \times \text{Exp}_{hsa\_circ\_0008309}$$

in our revised manuscript (Page 8, Paragraph 2), and the “RNAi assay” has been modified as “lentivirus-mediated stable gene silencing” in our revised manuscript (Page 10, Paragraph 1).

8) Page 24: "Representative H&E staining and statistical results of metastatic lung nodules from mice injected with the indicated cells via the tail vein for 60 days" The authors must state what is H&E.

9) Figure 6: The titles in the left are not centered.

**Response:** Thanks for pointing out this issue! The abbreviation “H&E” has been stated as hematoxylin and eosin (H&E) in the revised manuscript (Page 20 & Page 28), and the left titles have been centered in the revised Fig 4.

10) Figure 1: The authors should consider a different approach to explain the experimental procedure. Different colors and more space between the text are needed.

**Response:** We thank the reviewer for the suggestion. We have restructured the flowchart and added some details to make it more readable as shown in revised Fig 1.

#### **Referee #2 (Remarks for Author):**

In this manuscript, authors characterized a circRNA-based signature in prognostic evaluation of colon cancer. They found that cirScore of four circRNAs could be used to define colon cancer patients as high- and low-risk groups. Patients in high-risk group (with high cirScore) had a poorer DFS and OS than patients in low-risk group. This is a very interesting study.

**Response:** Thank you very much for your review of our manuscript. We also thank the reviewer for the positive comments and the following constructive suggestions.

Comments and suggestions:

1) In Figure 2D, 4 circRNAs are strongly predictive of DFS. Have authors tried to use a single circRNA (e.g. circRNA13452) or combination of two or three circRNAs to predict the prognosis of patients with colon cancer (e.g. circRNA13452 and hsa\_circ\_0087391)? What are the results?

**Response:** We thank the reviewer for the suggestion. Actually, we have compared the predicting performance of single circRNA with four-circRNA-based risk score (cirScore) and presented the results in Fig 2E. To address your concerns, we have also built the Cox regression model using the combination of the two or three circRNAs and conducted the time-dependent AUC analysis. As shown, we observed that the predicting performance of the four-circRNA-based risk score (cirScore)

mostly outperforms than single circRNA or other circRNA combination in training cohort. The results are shown in revised Fig 2E and below for your review, and described in the revised manuscript (Page 8, Paragraph 1).

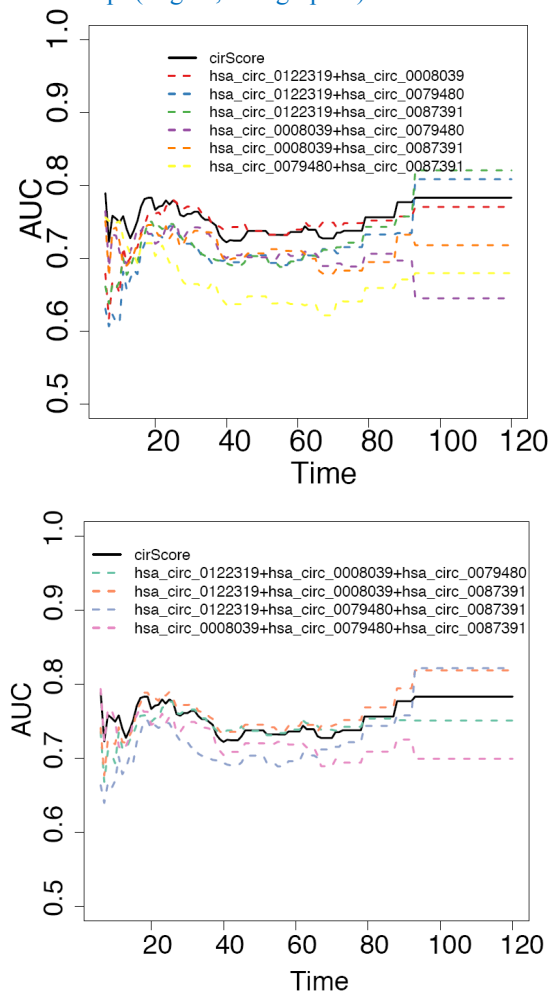

Figure R1. The left plot shown the time-dependent AUC of the two-marker combination signature and the cirScore, while the right plot depicted the value of the tree-marker combination signature and cirScore.

2) In page 9 and page 10, the number of tested nude mice should be 8 per group.

**Response:** Thanks for pointing out this issue! We have corrected the mistakes in our revised manuscript (Page 20, Paragraph 2).

3) As the result of knockdown of circRNAs (Figure S6B) is important, I suggest authors to move this data to Figure 6.

**Response:** We thank the reviewer for the suggestion. We have moved the panel of “knockdown of circRNAs” as Figs 4B and EV3C.

2nd Editorial Decision

14 May 2019

Thank you for the submission of your revised manuscript to EMBO Molecular Medicine. We have now received the enclosed report from the referee who was asked to re-assess it. As you will see this reviewer remains unsatisfied and still requires that two points previously raised be absolutely addressed. As these two points would necessitate extra-work and time, I have asked for editorial advice on this matter. Our external expert advisor fully agrees with the referee and stated the following: "I absolutely agree with this referee. The authors need to:

- 1- do the RNaseR resistant assessment (either by using Northern Blot or by adding a spike in before the RT qPCR)
- 2- do RNaseq to demonstrate that there are no off-target effects

So in my view the paper is not acceptable until these crucial experiments are done. Indeed the results of the experiments might preclude acceptance".

While we normally only offer one main round of revisions, in this case we have decided to make an exception. I would therefore strongly encourage you to address these two points experimentally as suggested. I'd like to say that depending on the nature of the revision, the paper may be sent back to referee #1.

Please submit your revised manuscript as soon as you possibly can.

\*\*\*\*\* Reviewer's comments \*\*\*\*\*

**Referee #1 (Remarks for Author):**

In the revision of the manuscript entitled "A circRNA signature predicts postoperative recurrence in stage II/III colon cancer" the authors addressed most of my concerns. In particular, the new experiments provide further support to the shRNA experiments. However, I am still not understanding why the authors can't perform a correct RNaseR resistant assessment (either by using Northern Blot or by adding a spike in before the RT qPCR). Only this will demonstrate that the effect is due to a circRNA and not to trans-splicing products. I am particularly worried about this as even w/o this normalization the circRNAs seem to be sensitive to RNaseR strongly suggesting that some of the detected molecules are not indeed circular.

In addition, I am not convinced by the off-target assessment. Can't the authors perform RNAseq to rule this out?

2nd Revision - authors' response

28 June 2019

**Referee #1 (Remarks for Author):**

In the revision of the manuscript entitled "A circRNA signature predicts postoperative recurrence in stage II/III colon cancer" the authors addressed most of my concerns. In particular, the new experiments provide further support to the shRNA experiments.

**Response:** Thanks for your critiques and suggestions. We apologize for not providing convincing data for these two previously raised points. Here, we have addressed these two points experimentally as suggested.

1) I am still not understanding why the authors can't perform a correct RNaseR resistant assessment (either by using Northern Blot or by adding a spike in before the RT qPCR). Only this will demonstrate that the effect is due to a circRNA and not to trans-splicing products. I am particularly worried about this as even w/o this normalization the circRNAs seem to be sensitive to RNaseR strongly suggesting that some of the detected molecules are not indeed circular.

**Response:** We apologize for not providing convincing data for this point. The reason why we didn't perform a correct RNaseR resistant assessment is because we misunderstood "spike in" last time. Thus, the expression of  $\beta$ -Actin in mock-treated group was used for normalization in our qRT-PCR experiment with reference to other reports (Cell Research. 2015, 25:981-984; Mol Cancer. 2019 Feb 4;18(1):20; Nat Struct Mol Biol. 2015 Mar;22(3):256-64.). Now, we know that spike-in control is an exogenous (or external) control. We have modified our experiment procedure with reference to the other reports (Mol Cell. 2017 Apr 6;66(1):9-21.e7; Methods Mol Biol. 2016;1402:215-227.), and described as following:

**RNaseR treatment of total RNA.** Total RNA (4  $\mu$ g) was isolated with TRIzol reagent (Cat. # 15596-08, Life Technologies, Carlsbad, USA), and incubated with 3U/ $\mu$ g of RNase R (Epicentre Technologies, Madison, WI, USA) for 15 min at 37 °C or mock treated. The RNA was immediately transferred to ice, spiked with 10% mouse RNA, and extracted with TRIzol Reagent. The RNA concentration of the control group was determined, the same volume (6  $\mu$ L) of control RNA and the RNaseR treated RNA was used for reverse transcription. The circRNA expression levels and corresponding host gene' mRNAs were analyzed by qRT-PCR quantification, and the mouse GAPDH mRNA was used for normalization as an exogenous control.



The results indicated that these circRNAs were more resistance to digestion with RNase R exonuclease compared with linear host genes, which further confirmed that these circRNAs harbors a circular RNA structure (Fig EV2B). The above modified experiment procedure has been added in Appendix Supplementary Methods (Characterization of the selected circRNAs), the results shown below have been updated in Figure EV2B and described in our revised manuscript (Paragraph 1, Page 8).

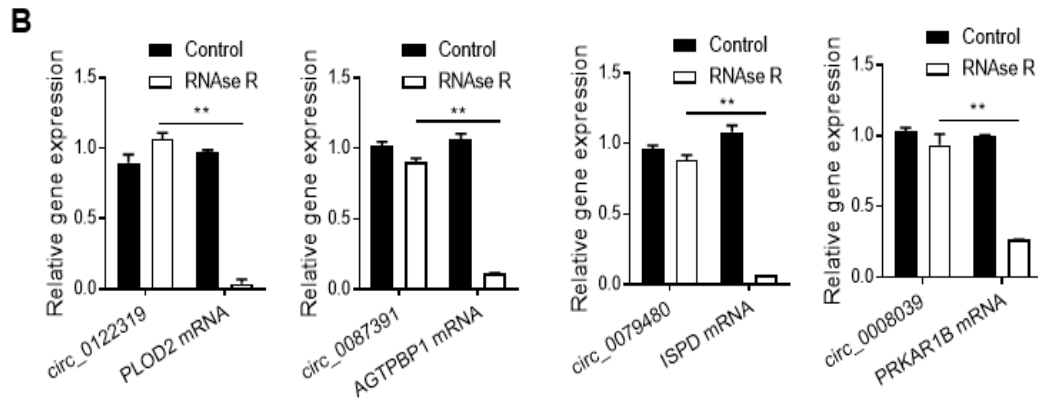

Figure EV2B. qRT-PCR analysis for the expression of four selected circRNAs and the corresponding host genes after treatment with RNase R in HCT116 cells. The data was normalized to mouse GAPDH mRNA by adding a mouse RNA spike to each fraction. \*\* $P < 0.01$ , Student's *t*-test.

2) In addition, I am not convinced by the off-target assessment. Can't the authors perform RNAseq to rule this out?

**Response:** We also apologize for not providing convincing data for this point. As suggested, we performed RNAseq and bioinformatic analysis to rule out off-target effects for the off-target assessment. The total RNA were prepared and subjected to RNA-sequencing study by the Corporation (Novogene, Beijing, China). The results demonstrated that knockdown of these circRNAs (hsa\_circ\_0122319, hsa\_circ\_0079480 and hsa\_circ\_0087391) had a high similarity of gene expression profile between the two independent shRNA group in SW620 and HCT116 cells (Spearman  $R > 0.98$ ,  $P < 0.001$ , Fig EV3E), suggesting that the functional effects results from knockdown of these circRNAs rather than off targets.

For bioinformatics analysis, raw sequencing reads were processed with a prebuilt RNA-sequencing pipeline which could be free accessed at <https://github.com/likelet/RNAseqPipe>. Briefly, we first applied quality control step on the raw reads with fastp program. Then, the STAR and RSEM were adopted to align the reads against the hg38 reference genome and quantification in gene level, respectively. We then compared the TPM value of all known genes from different shRNA library and perform a correlation analysis with spearman's coefficient.

The RNA sequencing data of these cell lines are available in The Sequence Read Archive (SRA) (<https://www.ncbi.nlm.nih.gov/bioproject>), and accession ID is PRJNA551560. These results shown below has been added in Figure EV3E and described in the revised manuscript (Paragraph 1, Page 10; Paragraph 1, Page 20).

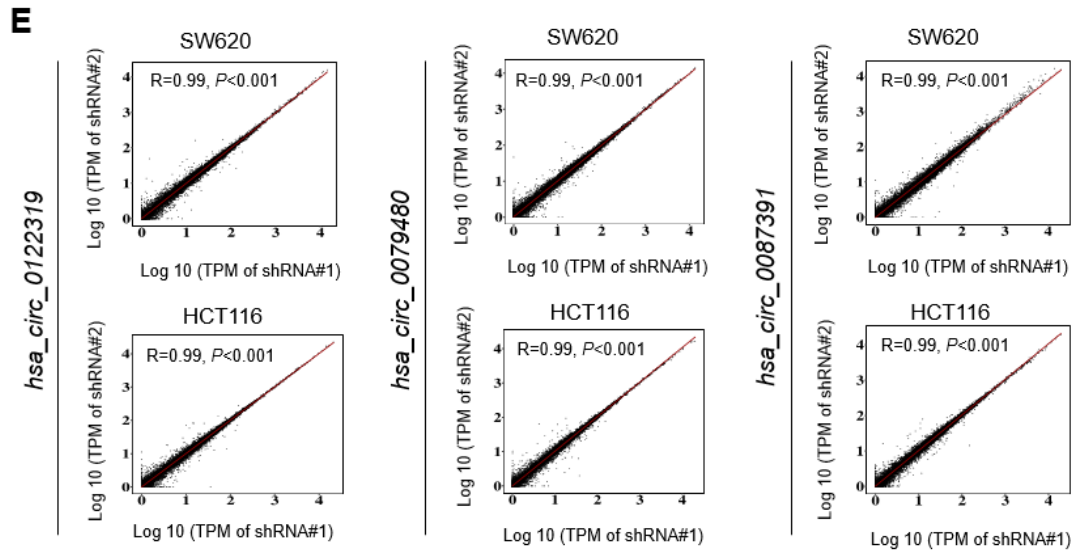

Figure EV3E. Correlation analysis of transcriptome between two independent shRNA groups in SW620 and HCT116 cells. In each scatter plot, the log<sub>10</sub> transformed Transcripts Per Million reads (TPM) of each gene were utilized for calculating the spearman's coefficient. R represent spearman's correlation coefficients, and P values were calculated by the spearman's correlation test.

3rd Editorial Decision

7 August 2019

Thank you for the submission of your revised manuscript to EMBO Molecular Medicine. We have now received the enclosed report from the referee who was asked to re-assess it. As you will see the reviewer is now supportive and I am pleased to inform you that we will be able to accept your manuscript pending the following final editorial amendments:

\*\*\*\*\* Reviewer's comments \*\*\*\*\*

**Referee #1 (Remarks for Author):**

The authors have addressed my concerns and the paper is now good for publication.

3rd Revision - authors' response

15 August 2019

The authors performed all minor editorial changes.

**YOU MUST COMPLETE ALL CELLS WITH A PINK BACKGROUND ↓**

PLEASE NOTE THAT THIS CHECKLIST WILL BE PUBLISHED ALONGSIDE YOUR PAPER

Corresponding Author Name: Rui-Hua Xu

Journal Submitted to: EMBO Molecular Medicine

Manuscript Number: EMM-2018-10168

### Reporting Checklist For Life Sciences Articles (Rev. June 2017)

This checklist is used to ensure good reporting standards and to improve the reproducibility of published results. These guidelines are consistent with the Principles and Guidelines for Reporting Preclinical Research issued by the NIH in 2014. Please follow the journal's authorship guidelines in preparing your manuscript.

#### A- Figures

##### 1. Data

###### The data shown in figures should satisfy the following conditions:

- the data were obtained and processed according to the field's best practice and are presented to reflect the results of the experiments in an accurate and unbiased manner.
- figure panels include only data points, measurements or observations that can be compared to each other in a scientifically meaningful way.
- graphs include clearly labeled error bars for independent experiments and sample sizes. Unless justified, error bars should not be shown for technical replicates.
- if  $n < 5$ , the individual data points from each experiment should be plotted and any statistical test employed should be justified
- Source Data should be included to report the data underlying graphs. Please follow the guidelines set out in the author ship guidelines on Data Presentation.

##### 2. Captions

###### Each figure caption should contain the following information, for each panel where they are relevant:

- a specification of the experimental system investigated (eg cell line, species name).
- the assay(s) and method(s) used to carry out the reported observations and measurements
- an explicit mention of the biological and chemical entity(ies) that are being measured.
- an explicit mention of the biological and chemical entity(ies) that are altered/varied/perturbed in a controlled manner.
- the exact sample size (n) for each experimental group/condition, given as a number, not a range;
- a description of the sample collection allowing the reader to understand whether the samples represent technical or biological replicates (including how many animals, litters, cultures, etc.).
- a statement of how many times the experiment shown was independently replicated in the laboratory.
- definitions of statistical methods and measures:
  - common tests, such as t-test (please specify whether paired vs. unpaired), simple  $\chi^2$  tests, Wilcoxon and Mann-Whitney tests, can be unambiguously identified by name only, but more complex techniques should be described in the methods section;
  - are tests one-sided or two-sided?
  - are there adjustments for multiple comparisons?
  - exact statistical test results, e.g., P values = x but not P values < x;
  - definition of 'center values' as median or average;
  - definition of error bars as s.d. or s.e.m.

Any descriptions too long for the figure legend should be included in the methods section and/or with the source data.

**In the pink boxes below, please ensure that the answers to the following questions are reported in the manuscript itself. Every question should be answered. If the question is not relevant to your research, please write NA (non applicable). We encourage you to include a specific subsection in the methods section for statistics, reagents, animal models and human subjects.**

#### B- Statistics and general methods

Please fill out these boxes ↓ (Do not worry if you cannot see all your text once you press return)

|                                                                                                                                                                                         |                                                                                                                                                                   |
|-----------------------------------------------------------------------------------------------------------------------------------------------------------------------------------------|-------------------------------------------------------------------------------------------------------------------------------------------------------------------|
| 1.a. How was the sample size chosen to ensure adequate power to detect a pre-specified effect size?                                                                                     | Sample size was chosen based on the need for statistical power. Reported in Material and Methods, 'Statistical analysis' subsection.                              |
| 1.b. For animal studies, include a statement about sample size estimate even if no statistical methods were used.                                                                       | Reported in Material and Methods, 'In vivo metastasis study' subsection.                                                                                          |
| 2. Describe inclusion/exclusion criteria if samples or animals were excluded from the analysis. Were the criteria pre-established?                                                      | NA                                                                                                                                                                |
| 3. Were any steps taken to minimize the effects of subjective bias when allocating animals/samples to treatment (e.g. randomization procedure)? If yes, please describe.                | Yes! Reported in Material and Methods, 'In vivo metastasis study' subsection.                                                                                     |
| For animal studies, include a statement about randomization even if no randomization was used.                                                                                          | The randomization of animal allocation was done by random numbers generated by computer. Reported in Material and Methods, 'In vivo metastasis study' subsection. |
| 4.a. Were any steps taken to minimize the effects of subjective bias during group allocation or/and when assessing results (e.g. blinding of the investigator)? If yes please describe. | As a retrospective study, for samples from sysucc, we randomly divided cohort into training and validation data set to reduce the effects of subjective bias      |
| 4.b. For animal studies, include a statement about blinding even if no blinding was done                                                                                                | No blinding procedure was undertaken for animal experiment. Reported in Material and Methods, 'In vivo metastasis study' subsection.                              |
| 5. For every figure, are statistical tests justified as appropriate?                                                                                                                    | Yes!                                                                                                                                                              |
| Do the data meet the assumptions of the tests (e.g., normal distribution)? Describe any methods used to assess it.                                                                      | Yes!                                                                                                                                                              |
| Is there an estimate of variation within each group of data?                                                                                                                            | Yes!                                                                                                                                                              |

#### USEFUL LINKS FOR COMPLETING THIS FORM

<http://www.antibodypedia.com>  
<http://1degreebio.org>  
<http://www.equator-network.org/reporting-guidelines/improving-bioscience-research-repo>  
  
<http://grants.nih.gov/grants/olaw/olaw.htm>  
<http://www.mrc.ac.uk/Ourresearch/Ethicsresearchguidance/Useofanimals/index.htm>  
<http://ClinicalTrials.gov>  
<http://www.consort-statement.org>  
<http://www.consort-statement.org/checklists/view/32-consort/66-title>  
  
<http://www.equator-network.org/reporting-guidelines/reporting-recommendations-for-tun>  
  
<http://datadryad.org>  
  
<http://figshare.com>  
  
<http://www.ncbi.nlm.nih.gov/gap>  
  
<http://www.ebi.ac.uk/ega>  
  
<http://biomodels.net/>  
  
<http://biomodels.net/miriam/>  
<http://jji.biochem.sun.ac.za>  
[http://oba.od.nih.gov/biosecurity/biosecurity\\_documents.html](http://oba.od.nih.gov/biosecurity/biosecurity_documents.html)  
<http://www.selectagents.gov/>

|                                                                                   |      |
|-----------------------------------------------------------------------------------|------|
| Is the variance similar between the groups that are being statistically compared? | Yes! |
|-----------------------------------------------------------------------------------|------|

### C- Reagents

|                                                                                                                                                                                                                                                                                                                              |                                                                                  |
|------------------------------------------------------------------------------------------------------------------------------------------------------------------------------------------------------------------------------------------------------------------------------------------------------------------------------|----------------------------------------------------------------------------------|
| 6. To show that antibodies were profiled for use in the system under study (assay and species), provide a citation, catalog number and/or clone number, supplementary information or reference to an antibody validation profile. e.g., Antibodypedia (see link list at top right), 1DegreeBio (see link list at top right). | Reported in Material and Methods, 'Immunoblotting analysis' subsection.          |
| 7. Identify the source of cell lines and report if they were recently authenticated (e.g., by STR profiling) and tested for mycoplasma contamination.                                                                                                                                                                        | Reported in Material and Methods, 'Cell culture and migration assay' subsection. |

\* for all hyperlinks, please see the table at the top right of the document

### D- Animal Models

|                                                                                                                                                                                                                                                                                                                                                                                    |                                                                          |
|------------------------------------------------------------------------------------------------------------------------------------------------------------------------------------------------------------------------------------------------------------------------------------------------------------------------------------------------------------------------------------|--------------------------------------------------------------------------|
| 8. Report species, strain, gender, age of animals and genetic modification status where applicable. Please detail housing and husbandry conditions and the source of animals.                                                                                                                                                                                                      | Reported in Material and Methods, 'In vivo metastasis study' subsection. |
| 9. For experiments involving live vertebrates, include a statement of compliance with ethical regulations and identify the committee(s) approving the experiments.                                                                                                                                                                                                                 | Reported in Material and Methods, 'In vivo metastasis study' subsection. |
| 10. We recommend consulting the ARRIVE guidelines (see link list at top right) (PLoS Biol. 8(6), e1000412, 2010) to ensure that other relevant aspects of animal studies are adequately reported. See author guidelines, under 'Reporting Guidelines'. See also: NIH (see link list at top right) and MRC (see link list at top right) recommendations. Please confirm compliance. | Reported in Material and Methods, 'In vivo metastasis study' subsection. |

### E- Human Subjects

|                                                                                                                                                                                                                                                                                                                    |                                                                    |
|--------------------------------------------------------------------------------------------------------------------------------------------------------------------------------------------------------------------------------------------------------------------------------------------------------------------|--------------------------------------------------------------------|
| 11. Identify the committee(s) approving the study protocol.                                                                                                                                                                                                                                                        | Reported in Material and Methods, 'Patient enrollment' subsection. |
| 12. Include a statement confirming that informed consent was obtained from all subjects and that the experiments conformed to the principles set out in the WMA Declaration of Helsinki and the Department of Health and Human Services Belmont Report.                                                            | Reported in Material and Methods, 'Patient enrollment' subsection. |
| 13. For publication of patient photos, include a statement confirming that consent to publish was obtained.                                                                                                                                                                                                        | NA                                                                 |
| 14. Report any restrictions on the availability (and/or on the use) of human data or samples.                                                                                                                                                                                                                      | NA                                                                 |
| 15. Report the clinical trial registration number (at ClinicalTrials.gov or equivalent), where applicable.                                                                                                                                                                                                         | NA                                                                 |
| 16. For phase II and III randomized controlled trials, please refer to the CONSORT flow diagram (see link list at top right) and submit the CONSORT checklist (see link list at top right) with your submission. See author guidelines, under 'Reporting Guidelines'. Please confirm you have submitted this list. | NA                                                                 |
| 17. For tumor marker prognostic studies, we recommend that you follow the REMARK reporting guidelines (see link list at top right). See author guidelines, under 'Reporting Guidelines'. Please confirm you have followed these guidelines.                                                                        | Yes, we have followed the REMARK guideline.                        |

### F- Data Accessibility

|                                                                                                                                                                                                                                                                                                                                                                                                                                                                                                                                                                                                                                                                                                   |                                                                                                                                                                                                                                                                                                                       |
|---------------------------------------------------------------------------------------------------------------------------------------------------------------------------------------------------------------------------------------------------------------------------------------------------------------------------------------------------------------------------------------------------------------------------------------------------------------------------------------------------------------------------------------------------------------------------------------------------------------------------------------------------------------------------------------------------|-----------------------------------------------------------------------------------------------------------------------------------------------------------------------------------------------------------------------------------------------------------------------------------------------------------------------|
| 18: Provide a "Data Availability" section at the end of the Materials & Methods, listing the accession codes for data generated in this study and deposited in a public database (e.g. RNA-Seq data: Gene Expression Omnibus GSE39462, Proteomics data: PRIDE PXD000208 etc.) Please refer to our author guidelines for 'Data Deposition'.<br><br>Data deposition in a public repository is mandatory for:<br>a. Protein, DNA and RNA sequences<br>b. Macromolecular structures<br>c. Crystallographic data for small molecules<br>d. Functional genomics data<br>e. Proteomics and molecular interactions                                                                                        | The RNA sequencing data of colorectal cancer patients are available in The Genome Sequence Archive for Human (GSA-Human) ( <a href="http://bigd.big.ac.cn/gsa-human/">http://bigd.big.ac.cn/gsa-human/</a> ), and accession ID is HRA000037.<br><br>Reported in Material and Methods, 'Data availability' subsection. |
| 19. Deposition is strongly recommended for any datasets that are central and integral to the study; please consider the journal's data policy. If no structured public repository exists for a given data type, we encourage the provision of datasets in the manuscript as a Supplementary Document (see author guidelines under 'Expanded View' or in unstructured repositories such as Dryad (see link list at top right) or Figshare (see link list at top right)).                                                                                                                                                                                                                           | Reported as 'Expanded View'.                                                                                                                                                                                                                                                                                          |
| 20. Access to human clinical and genomic datasets should be provided with as few restrictions as possible while respecting ethical obligations to the patients and relevant medical and legal issues. If practically possible and compatible with the individual consent agreement used in the study, such data should be deposited in one of the major public access-controlled repositories such as dbGAP (see link list at top right) or EGA (see link list at top right).                                                                                                                                                                                                                     | NA                                                                                                                                                                                                                                                                                                                    |
| 21. Computational models that are central and integral to a study should be shared without restrictions and provided in a machine-readable form. The relevant accession numbers or links should be provided. When possible, standardized format (SBML, CellML) should be used instead of scripts (e.g. MATLAB). Authors are strongly encouraged to follow the MIRIAM guidelines (see link list at top right) and deposit their model in a public database such as Biocompare (see link list at top right) or JWS Online (see link list at top right). If computer source code is provided with the paper, it should be deposited in a public repository or included in supplementary information. | The core analysis/plot code for this manuscript was already released on a public code repository Github. It can be free accessed at <a href="https://github.com/likelet/CircRNA_colon_recurrent_prediction">https://github.com/likelet/CircRNA_colon_recurrent_prediction</a> under a GNU_v3 License.                 |

### G- Dual use research of concern

|                                                                                                                                                                                                                                                                                               |    |
|-----------------------------------------------------------------------------------------------------------------------------------------------------------------------------------------------------------------------------------------------------------------------------------------------|----|
| 22. Could your study fall under dual use research restrictions? Please check biosecurity documents (see link list at top right) and list of select agents and toxins (APHIS/CDC) (see link list at top right). According to our biosecurity guidelines, provide a statement only if it could. | NA |
|-----------------------------------------------------------------------------------------------------------------------------------------------------------------------------------------------------------------------------------------------------------------------------------------------|----|
